# Supplementary material for: Plasma Metabolomics Analysis Based on GC‐MS in Infertile Males with Kidney‐Yang Deficiency Syndrome
Source: Hindawi journal article supplement (doi:10.1155/2017/6270195), 2017-01-01

# Scientific Research Project Review and Approval of Medical Ethics

## Committee of the Xiangya Hospital of Centre South University

Ethical Review (Scientific) No. 201407389

|                      |                                                                                                                                                                                                                  |                |                                                                                       |                              |            |
|----------------------|------------------------------------------------------------------------------------------------------------------------------------------------------------------------------------------------------------------|----------------|---------------------------------------------------------------------------------------|------------------------------|------------|
| Project Name         | Plasma Metabolomics Analysis based on GC-MS in Infertile Males with Kidney-Yang Deficiency Syndrome                                                                                                              |                |                                                                                       |                              |            |
| Specialty            | Andrology of TCM                                                                                                                                                                                                 | Responsibility | Principal <input checked="" type="checkbox"/><br>Participant <input type="checkbox"/> | Principal Investigator       | Jiekun Luo |
| Category             | 1 <input checked="" type="checkbox"/> 2 <input type="checkbox"/> 3 <input type="checkbox"/> 4 <input type="checkbox"/> 5 <input type="checkbox"/>                                                                | Research Time  |                                                                                       | August 2014 to December 2014 |            |
| Type                 | Clinical Research                                                                                                                                                                                                |                |                                                                                       |                              |            |
| Research Institution | Male Department of Integrated Traditional Chinese and Western Medicine, Xiangya Hospital of Central South University                                                                                             |                |                                                                                       |                              |            |
| Comment              | Consent <input checked="" type="checkbox"/> ;Need Modification <input type="checkbox"/> ;Disagree <input type="checkbox"/> ;Termination <input type="checkbox"/> ; Pause the experiment <input type="checkbox"/> |                |                                                                                       |                              |            |

### The main content of the research involving human research ethics:

The research needs a venous blood sample drawn from each participant. Plasma samples are collected for metabolomic analyses based on GC-MS. No drug intervention. All participants had written informed consent. The research content and results do not involve participant's personal privacy; there is no conflict of interest.

### Ethical review comment:

The research was reviewed and approved by the Ethic Committee of the Xiangya Hospital of Central South University. This is to certificate that the research design and methods are in accordance with the requirements of regulations and procedures regarding to human subject protection laws such as GCP and ICH-GCP.

Notes: Research Category: 1 = The use of pathological tissue; 2 = Human trial; 3 = Human tissue or cell test; 4 = Embryonic cloning research; 5 = Others.  
Research Type: 1.Clinical Research; 2.Fundamental Research

**Ethic Committee of the  
Xiangya Hospital of Central South University**  
Date of review and approval:

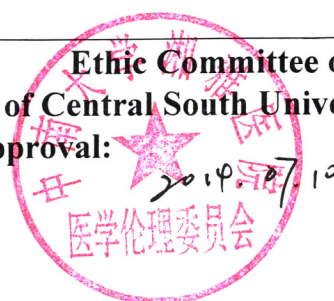

Supplement: f1 [file 6270195.f1.zip]
