# Supplementary material for: Plasma Metabolomics Analysis Based on GC‐MS in Infertile Males with Kidney‐Yang Deficiency Syndrome
Source: Hindawi journal article supplement (doi:10.1155/2017/6270195), 2017-01-01
Supplement: f1 [file 6270195.f1.zip]

## Supplementary information

Table 1 Qualitative and quantitative analysis of metabolic profiles of healthy control (HC) Group and KYDS Group.

| No. | Metabolites              | HMDB      | Relative concentrations (%) |             |
|-----|--------------------------|-----------|-----------------------------|-------------|
|     |                          |           | KYDS (n=67)                 | HC (n=55)   |
| 1   | Oxalic acid              | HMDB02329 | 0.093±0.023                 | 0.090±0.030 |
| 2   | Pyruvate                 | HMDB00243 | 0.016±0.008                 | 0.018±0.006 |
| 3   | Lactate                  | HMDB00190 | 1.771±0.513                 | 1.853±0.372 |
| 4   | Alanine                  | HMDB00161 | 0.146±0.059                 | 0.147±0.046 |
| 5   | Phenylpropionic acid     | HMDB00764 | 0.296±0.083                 | 0.257±0.069 |
| 6   | Glycine                  | HMDB00123 | 0.061±0.028                 | 0.068±0.069 |
| 7   | 12-hydroxybutyrate       | HMDB00008 | 0.026±0.008                 | 0.039±0.011 |
| 8   | N-Acetyl glycine         | HMDB00532 | 0.007±0.003                 | 0.005±0.001 |
| 9   | 23-hydroxybutyrate       | HMDB00357 | 0.030±0.022                 | 0.036±0.034 |
| 10  | α-Hydroxyvaleric acid    | HMDB01863 | 0.010±0.003                 | 0.007±0.003 |
| 11  | Trisiloxane              | NA        | 0.007±0.004                 | 0.006±0.002 |
| 12  | L-Valine                 | HMDB00883 | 0.101±0.043                 | 0.103±0.050 |
| 13  | L-isoleucine             | HMDB00172 | 0.035±0.009                 | 0.045±0.025 |
| 14  | Proline                  | HMDB00162 | 0.071±0.035                 | 0.067±0.037 |
| 15  | Fumaric acid             | HMDB00134 | 0.007±0.003                 | 0.007±0.003 |
| 16  | L-serine                 | HMDB00187 | 0.069±0.009                 | 0.061±0.014 |
| 17  | Creatinine enol          | HMDB00562 | 0.025±0.008                 | 0.027±0.009 |
| 18  | 2,3,4-Trihydroxybutyrate | HMDB00613 | 0.010±0.004                 | 0.011±0.005 |
| 19  | Ornithine                | HMDB00214 | 0.031±0.016                 | 0.038±0.019 |
| 20  | Glutamic acid            | HMDB00148 | 0.024±0.009                 | 0.030±0.013 |
| 21  | Phenylalanine            | HMDB00159 | 0.033±0.009                 | 0.038±0.007 |
| 22  | Lysine                   | HMDB00182 | 0.037±0.021                 | 0.048±0.012 |
| 23  | 1,5-Anhydroglucitol      | HMDB02712 | 0.191±0.040                 | 0.122±0.056 |
| 24  | Fructose I               | HMDB01076 | 0.010±0.015                 | 0.008±0.002 |
| 25  | Fructose II              | HMDB06800 | 0.012±0.012                 | 0.020±0.006 |
| 26  | Galactose Glucitol       | HMDB05826 | 0.031±0.009                 | 0.040±0.018 |
| 27  | Glucose I                | HMDB01306 | 1.953±0.360                 | 1.846±0.417 |
| 28  | Glucose II               | HMDB01401 | 0.522±0.176                 | 0.504±0.170 |
| 29  | L-tyrosine               | HMDB00158 | 0.036±0.007                 | 0.037±0.007 |
| 30  | Palmitic acid            | HMDB00220 | 0.297±0.054                 | 0.286±0.060 |
| 31  | Myo-inositol             | HMDB00211 | 0.025±0.004                 | 0.026±0.009 |
| 32  | Uric acid                | HMDB00289 | 0.113±0.046                 | 0.108±0.044 |
| 33  | Linoleic acid            | HMDB00673 | 0.198±0.043                 | 0.187±0.044 |
| 34  | Elaidic acid             | HMDB00573 | 0.172±0.057                 | 0.166±0.562 |
| 35  | Stearic acid             | HMDB00827 | 0.137±0.025                 | 0.127±0.222 |
| 36  | Arachidonic acid         | HMDB01043 | 0.031±0.010                 | 0.029±0.010 |

|    |             |           |             |             |
|----|-------------|-----------|-------------|-------------|
| 37 | Cholesterol | HMDB00067 | 0.365±0.073 | 0.351±0.063 |
|----|-------------|-----------|-------------|-------------|

Concentrations are presented as mean ± SD by the ratio of its peaks area to that of the internal standard on the same chromatogram.

Table 2 Characteristics of the study population (n=122).

|                                            | KYDS Group (n=67) |              | HC Group (n=55) |
|--------------------------------------------|-------------------|--------------|-----------------|
|                                            | ED (n=24)         | SA (n=43)    |                 |
| Age (years)                                | 28.92±5.21*       | 29.07±4.92*  | 30.45±5.56      |
| Weight (kg)                                | 74.27±4.36*       | 76.93±4.74*  | 75.38±4.80      |
| The course of infertility (years)          | 2.81±0.62         | 2.84±0.39    | NA              |
| Sperm concentration (10 <sup>6</sup> /ml ) | 89.28±40.79       | 26.99±40.68# | 88.98±75.60     |
| a+b grade sperm rate (%)                   | 62.88±10.22       | 15.12±16.35# | 61.27±14.22     |
| b grade sperm rate (%)                     | 33.28±9.95        | 4.37±6.16#   | 42.41±10.89     |
| Normal morphology sperm rate (%)           | 48.75±39.07       | 5.75±10.34#  | 33.98±26.82     |

\*p>0.05 when compared between HC group.

# p<0.05 when compared between HC group.
