# Supplementary material for: Plasma Metabolomics Analysis Based on GC-MS in Infertile Males with Kidney-Yang Deficiency Syndrome
Source: Evid Based Complement Alternat Med. 2017 Sep 25;2017:6270195. doi: 10.1155/2017/6270195 (PMC5674502; doi:10.1155/2017/6270195)
Supplement: Supplementary file 1 — S1 File: Original data of all participants. The rows represent 122 samples and the columns represent 37 metabolites' relative concentrations. S2 File: Ethics Review Table. S3 File: User's Guide of NIST program. S4 File: Tables. [file 6270195.f1.zip]

Archive with 4 entries (4 files):
- mat.6270195.v1 (3) (1).xlsx
- S2 File. Ethics Review Table (1).pdf
- S3 File. User Guide of NIST program (1).pdf
- Supplementary Tables (1).pdf
