# Supplementary material for: Plasma Metabolomics Analysis Based on GC-MS in Infertile Males with Kidney-Yang Deficiency Syndrome
Source: Evid Based Complement Alternat Med. 2017 Sep 25;2017:6270195. doi: 10.1155/2017/6270195 (PMC5674502; doi:10.1155/2017/6270195)
Supplement: Supplementary file 1 — S1 File: Original data of all participants. The rows represent 122 samples and the columns represent 37 metabolites' relative concentrations. S2 File: Ethics Review Table. S3 File: User's Guide of NIST program. S4 File: Tables. [file 6270195.f1.zip › mat.6270195.v1 (3) (1).xlsx]

## Sheet: Sheet1
sample	group	Oxalic acid	Pyruvate	Lactate	Alanine	Phenylpropionic acid	Glycine	12-hydroxybutyrate	N-Acetylglycine	23-hydroxybutyrate	α-Hydroxyvaleric acid	Trisiloxane	L-Valine	L-isoleucine	Proline	Fumaric acid	L-serine	Creatinine enol	2,3,4-Trihydroxybutyrate	Ornithine	Glutamic acid	Phenylalanine	Lysine	1,5-Anhydroglucitol	Fructose I	Fructose II	Galactose Glucitol	Glucose I	Glucose II	L-tyrosine	Palmitic acid	Myo-inositol	Uric acid	Linoleic acid	Elaidic acid	Stearic acid	Arachidonic acid	Cholesterol
HC1	HC	0.010297	0.0183148	2.22126	0.189197	0.172166	0.0792246	0.058354	0.00708043	0.0467585	0.0113019	0.00441992	0.163511	0.0492906	0.0699254	0.00448279	0.076503	0.0348817	0.0138956	0.045384	0.0458937	0.0493349	0.0726936	0.250767	0.00832803	0.0146374	0.0266737	1.60975	0.404339	0.0442274	0.352068	0.0225728	0.196067	0.223455	0.227665	0.16085	0.0470931	0.410361
HC2	HC	0.00942698	0.0152216	2.07427	0.18641	0.233119	0.0856005	0.0241775	0.00433227	0.0370877	0.00849091	0.00562326	0.131841	0.0324392	0.117968	0.00784471	0.0577759	0.0279412	0.0145437	0.0768453	0.0238025	0.0394609	0.0461716	0.140644	0.009327	0.0307212	0.0529012	2.47843	0.768823	0.0342257	0.306998	0.046957	0.107683	0.266445	0.295533	0.158455	0.0288146	0.502791
HC3	HC	0.00883733	0.0117447	1.6704	0.0758249	0.24074	0.0524578	0.059443	0.005029	0.171886	0.0155375	0.00572711	0.0910342	0.0361913	0.0384208	0.00648839	0.0519915	0.0309193	0.00826409	0.0219395	0.0571081	0.0303449	0.0363527	0.079144	0.00796598	0.0213318	0.0973025	1.97424	0.556489	0.0320965	0.301673	0.0149644	0.0287144	0.153342	0.16532	0.128099	0.0518833	0.314573
HC4	HC	0.00922938	0.0115683	1.64625	0.0590919	0.239494	0.0405636	0.0589684	0.00506876	0.169496	0.0141972	0.005418	0.0601088	0.0226506	0.0170809	0.00561212	0.0459281	0.0306583	0.00945947	0.0145569	0.052712	0.0287127	0.0207844	0.0941294	0.00759973	0.0238	0.0987407	2.06487	0.568603	0.0319684	0.304197	0.0188505	0.0293436	0.152885	0.167872	0.143187	0.0507545	0.341324
HC5	HC	0.00916593	0.0126568	2.08861	0.200499	0.182007	0.0924961	0.0379242	0.00399349	0.0362408	0.00926758	0.00578253	0.179485	0.0422157	0.0895775	0.00409181	0.0555664	0.0379821	0.0114798	0.0470449	0.0387686	0.0473033	0.0654041	0.199706	0.00966721	0.0284411	0.0371065	1.91869	0.534087	0.0409565	0.296853	0.0237958	0.140688	0.25479	0.204866	0.142783	0.0261726	0.309877
HC6	HC	0.012515	0.0144146	2.09245	0.198122	0.18487	0.0850821	0.0395499	0.0060374	0.0378006	0.0117849	0.00699831	0.158254	0.0415022	0.090315	0.00378859	0.057237	0.0394347	0.00975407	0.0370131	0.0381116	0.0478254	0.0526154	0.201291	0.00781547	0.0273731	0.0371313	1.95118	0.545162	0.0452753	0.312225	0.0280772	0.148541	0.262059	0.213285	0.153786	0.0262751	0.341859
HC7	HC	0.087474	0.0164778	1.91937	0.0821148	0.351966	0.0251063	0.0277812	0.00831794	0.0317504	0.00475072	0.0104717	0.065534	0.0208125	0.0187512	0.00327082	0.0281639	0.0144543	0.0172377	0.00398916	0.0147643	0.0235551	0.0104383	0.0790944	0.00791609	0.0133513	0.0353682	1.91507	0.543588	0.0297516	0.310412	0.0170911	0.0649871	0.19948	0.218217	0.12138	0.0320406	0.374268
HC8	HC	0.0819564	0.0124111	1.91933	0.0716793	0.346431	0.0155366	0.0273546	0.00722504	0.0296824	0.0037029	0.00834676	0.0559321	0.0171968	0.0132276	0.00657217	0.0220758	0.0125783	0.0172629	0.00283452	0.0149826	0.0244942	0.00531155	0.0823845	0.00851144	0.0130867	0.0361625	1.96157	0.546994	0.0303458	0.32228	0.017829	0.071798	0.205658	0.227587	0.136992	0.031606	0.405438
HC9	HC	0.108215	0.0123781	1.52089	0.138761	0.192458	0.060745	0.0310608	0.00496125	0.0399442	0.00906894	0.00651611	0.159355	0.0483607	0.081588	0.00783176	0.0756495	0.0204634	0.0129953	0.0458147	0.0296928	0.0390983	0.0635113	0.183854	0.00668979	0.0193238	0.0292175	1.78279	0.491567	0.0411184	0.266676	0.0182834	0.132471	0.22777	0.19275	0.120766	0.0242269	0.44183
HC10	HC	0.0892792	0.0317475	3.63038	0.188662	0.200947	0.0664175	0.0242342	0.00560726	0.0160843	0.00786908	0.00878506	0.112837	0.0382703	0.0792766	0.00585698	0.0598653	0.0508659	0.00815106	0.0353085	0.0785214	0.0492814	0.0540114	0.103238	0.012508	0.0165027	0.0197364	0.642744	0.126708	0.037923	0.489081	0.0499021	0.213439	0.288462	0.285375	0.117919	0.0304323	0.308663
HC11	HC	0.0979856	0.0148476	1.83459	0.101542	0.438396	0.0340425	0.0272954	0.00432728	0.0232795	0.00757246	0.00846864	0.0932076	0.0306608	0.033301	0.000712819	0.0609656	0.0156505	0.0158331	0.00852374	0.0294416	0.0322499	0.0104792	0.112119	0.00786588	0.0124221	0.0493028	1.94679	0.576184	0.0398456	0.210605	0.0291125	0.0735756	0.15465	0.0930858	0.11439	0.0273232	0.300669
HC12	HC	0.0820717	0.015892	1.79137	0.129981	0.171222	0.0397915	0.0215218	0.00342839	0.0290873	0.00437011	0.00601868	0.110351	0.0329317	0.0424101	0.00676834	0.0463137	0.0307589	0.00864818	0.0218156	0.0334183	0.0351652	0.0600412	0.068848	0.00650593	0.0121684	0.0255508	1.22248	0.286911	0.0294175	0.390247	0.0244419	0.156568	0.190216	0.184118	0.0835543	0.0242344	0.276107
HC13	HC	0.105546	0.0176247	2.0653	0.180676	0.275166	0.0713015	0.0544755	0.00516876	0.0433349	0.00933432	0.00694605	0.153071	0.046353	0.0656689	0.00762056	0.0725678	0.0363488	0.0134318	0.0376265	0.0451116	0.0509928	0.0556001	0.232707	0.00812333	0.0135893	0.0272726	1.4647	0.368734	0.0423857	0.337305	0.0215898	0.19888	0.207836	0.207945	0.157404	0.041798	0.324453
HC14	HC	0.0923947	0.0160827	1.72095	0.154674	0.303939	0.0748835	0.0190663	0.00480124	0.0299244	0.00743381	0.00658028	0.0995085	0.0265272	0.0902844	0.00940985	0.0484809	0.0219758	0.0115883	0.0646585	0.0195307	0.0329644	0.0400645	0.114203	0.00796349	0.024274	0.0429228	2.08669	0.631016	0.0277497	0.238122	0.0357842	0.0883226	0.203472	0.233371	0.113415	0.021689	0.261953
HC15	HC	0.101196	0.0163461	1.90461	0.213757	0.21604	0.0815107	0.0329208	0.00626224	0.0421762	0.0104127	0.00591042	0.169287	0.0578178	0.0931599	0.0066087	0.0574892	0.00862199	0.0152114	0.0738541	0.0315185	0.0379768	0.0411235	0.22771	0.00859962	0.027183	0.0456627	2.28399	0.713987	0.0410109	0.320454	0.0205806	0.210311	0.227944	0.197627	0.124614	0.0324889	0.353169
HC16	HC	0.100959	0.0103375	1.56735	0.0765956	0.186638	0.0519764	0.0593646	0.00408836	0.163814	0.0144268	0.00695398	0.10303	0.0380278	0.0432373	0.00491307	0.0517243	0.0287809	0.00748695	0.0264778	0.0561467	0.032651	0.0423926	0.0868329	0.0075954	0.0285736	0.0982273	1.93226	0.545558	0.0333835	0.251693	0.0175202	0.034389	0.1277	0.149204	0.105154	0.0351945	0.260502
HC17	HC	0.109671	0.0118921	1.74014	0.163771	0.239034	0.0726971	0.0344032	0.00489583	0.0295719	0.00940358	0.00428969	0.130031	0.0355089	0.0757157	0.00339402	0.0493294	0.0377565	0.00748143	0.0343699	0.0332025	0.0410204	0.0446816	0.169917	0.00500814	0.00949864	0.0346711	1.6232	0.450551	0.0328736	0.221844	0.0249807	0.103141	0.184497	0.157321	0.102197	0.0172491	0.26958
HC18	HC	0.0992152	0.0241447	1.92932	0.146993	0.235587	0.0755591	0.0258712	0.00402396	0.0109599	0.00786425	0.00703768	0.11615	0.031158	0.0935497	0.00812307	0.0435086	0.025218	0.0155024	0.0994245	0.0434712	0.0360227	0.0399818	0.134247	0.00456748	0.0132033	0.0264629	1.75872	0.486817	0.0329285	0.34135	0.0420453	0.122756	0.143227	0.187391	0.136281	0.040987	0.340475
HC19	HC	0.094116	0.0254947	1.93353	0.153584	0.244241	0.07033	0.0271388	0.00551372	0.0109838	0.00825891	0.00734181	0.12284	0.0323727	0.0963709	0.0102572	0.0466888	0.0245633	0.0152065	0.0698097	0.0465521	0.0407412	0.027844	0.14567	0.00630656	0.0160449	0.0279575	1.78426	0.504856	0.0323617	0.348624	0.0455886	0.130929	0.143711	0.190096	0.13863	0.0382039	0.346285
HC20	HC	0.0828253	0.025378	3.16614	0.102319	0.35347	0.0237192	0.015088	0.00596349	0.014664	0.00571036	0.00912882	0.0479088	0.0262634	0.0260903	0.00352393	0.041448	0.0107597	0.00595971	0.00681064	0.0552332	0.0279402	0.00844804	0.0915253	0.0119801	0.0113798	0.0148198	0.539655	0.10676	0.0312512	0.410927	0.0458399	0.149061	0.236607	0.236932	0.0948623	0.0284603	0.270401
HC21	HC	0.111316	0.00334872	1.60848	0.142894	0.208256	0.0816087	0.0309655	0.00505026	0.00435284	0.00599282	0.00761586	0.173302	0.0509649	0.0994522	0.00387352	0.0774917	0.0366177	0.0115359	0.0480258	0.032381	0.042324	0.0699405	0.0959961	0.00642953	0.0143815	0.0456835	1.70358	0.461407	0.0403644	0.207202	0.0236234	0.0628701	0.00194545	0.000232738	0.112436	0.0275615	0.284449
HC22	HC	0.117783	0.0205629	1.96833	0.243162	0.170658	0.0921723	0.02169	0.00494973	0.0139194	0.00629562	0.00491844	0.0195431	0.0746712	0.00289703	0.0044742	0.0778709	0.0225641	0.0111133	0.057809	0.0177656	0.0401409	0.0714867	0.114043	0.00676256	0.0230882	0.0267934	1.95808	0.550594	0.0372599	0.249092	0.0173561	0.0745968	0.151745	0.108472	0.121061	0.0146976	0.392397
HC23	HC	0.112212	0.0163804	1.63362	0.187921	0.213732	0.077166	0.0215958	0.0045448	0.0168906	0.00523531	0.00809541	0.0167209	0.113585	0.00306458	0.00728772	0.0775067	0.0216618	0.0127872	0.0512721	0.0244258	0.0391899	0.074433	0.139938	0.00723522	0.0267336	0.0331323	1.88031	0.532163	0.0487076	0.227668	0.0187102	0.124058	0.142049	0.0964943	0.114119	0.0193964	0.319707
HC24	HC	0.104255	0.0161055	1.5795	0.152163	0.209223	0.125804	0.0306064	0.00657412	0.0324122	0.0059519	0.00565078	0.0200609	0.0865604	0.00365398	0.00822994	0.0631969	0.0333906	0.0163151	0.0482343	0.0363092	0.0461807	0.0724422	0.171969	0.00678706	0.0250467	0.0546503	2.31685	0.730456	0.0521731	0.313829	0.0299013	0.163674	0.198903	0.218819	0.13488	0.0238013	0.235696
HC25	HC	0.0981087	0.0245449	2.12988	0.142177	0.266579	0.0567382	0.021654	0.00307121	0.0469637	0.00625035	0.00788671	0.0188413	0.0519628	0.0034904	0.00556535	0.0520227	0.0269785	0.021231	0.0236004	0.0196038	0.0407772	0.0430533	0.162583	0.00691669	0.0157379	0.0335851	1.45802	0.343303	0.0270751	0.35831	0.0216886	0.06048	0.198968	0.259007	0.149939	0.0268609	0.279435
HC26	HC	0.091337	0.0220584	1.6409	0.0947825	0.221162	0.0535329	0.0201092	0.0056602	0.0479963	0.00529065	0.00532405	0.0190835	0.0315239		0.00339988	0.05439	0.0203312	0.0103837	0.0119887	0.0180219	0.0260003	0.0185264	0.066719	0.00547577	0.020678	0.0468541	2.08577	0.627409	0.0279122	0.235967	0.0194289	0.057119	0.169443	0.176993	0.11852	0.0192991	0.369195
HC27	HC	0.0910845	0.0228	1.6421	0.0968195	0.219754	0.0451441	0.0200674	0.00551276	0.0470466	0.00439406	0.00404039	0.019773	0.0348196	0.00276085	0.00575203	0.0539354	0.026214	0.0129657	0.0104703	0.0197068	0.025152	0.012704	0.065706	0.00789268	0.0208517	0.046485	2.08824	0.622671	0.0289096	0.237401	0.0189923	0.0592404	0.176124	0.179015	0.118764	0.0208569	0.388229
HC28	HC	0.0893565	0.0292943	1.79376	0.190476	0.259684	0.0723014	0.0246877	0.00625751	0.0184729	0.00752727	0.00612494	0.0176769	0.136383	0.0036548	0.00853305	0.0638866	0.0163763	0.00734947	0.0381027	0.0195176	0.0417902	0.0540764	0.109688	0.00835372	0.0300394	0.0415342	2.11082	0.631931	0.0454459	0.263534	0.0299842	0.171552	0.193389	0.101502	0.114569	0.0211662	0.459501
HC29	HC	0.0982837	0.0301614	1.79342	0.193752	0.267857	0.0695447	0.0267969	0.00579765	0.0177993	0.0071581	0.0045742	0.0194846	0.139078	0.0043882	0.00859635	0.060609	0.0211848	0.00836798	0.0338722	0.0216617	0.041269	0.0454586	0.109852	0.00842225	0.0313524	0.0431803	2.06196	0.623978	0.0423469	0.253575	0.0296253	0.175027	0.191206	0.104915	0.114609	0.0202878	0.434826
HC30	HC	0.119351	0.0140535	1.47454	0.0986216	0.219237	0.0558041	0.0254051	0.00665383	0.0434837	0.00549143	0.00504414	0.0157752	0.0716425	0.00213813	0.00321633	0.0588529	0.0241186	0.00736285	0.0332764	0.0254447	0.0382068	0.0436822	0.0381682	0.00488232	0.0162392	0.033767	1.60783	0.439441	0.0370292	0.223342	0.0372164	0.137067	0.152529	0.143305	0.0953392	0.0180627	0.406443
HC31	HC	0.0994125	0.0147291	2.11066	0.239968	0.240511	0.0563347	0.0418405	0.00598057	0.0207766	0.00970435	0.0064355	0.0154601	0.0825358	0.00396176	0.0114977	0.0783866	0.0317857	0.00676762	0.0327706	0.0323803	0.05102	0.0426102	0.160897	0.00762157	0.0154838	0.0263848	2.03736	0.598215	0.0410944	0.374236	0.0243897	0.161228	0.244145	0.207569	0.168167	0.0324337	0.367908
HC32	HC	0.0958706	0.019564	1.80944	0.222661	0.243147	0.0792354	0.0187825	0.00421188	0.0117558	0.00457868	0.00362627	0.0930466	0.0285817	0.0706978	0.0101864	0.0775561	0.0251888	0.00741581	0.0455084	0.0164155	0.0362497	0.0537967	0.102753	0.00662801	0.0161381	0.0245083	1.81939	0.477295	0.0346955	0.213555	0.0190565	0.0760067	0.1633	0.101068	0.095587	0.0196617	0.339633
HC33	HC	0.0957493	0.0198379	1.81243	0.223156	0.249031	0.0724683	0.0189367	0.00435069	0.0129933	0.00658019	0.00428574	0.0933781	0.0304078	0.0725116	0.00631192	0.0741711	0.0252057	0.00745809	0.0339715	0.0170006	0.0371932	0.0393021	0.0979352	0.00555041	0.0162982	0.0231541	1.8219	0.478985	0.0354002	0.221896	0.0208626	0.0795064	0.16708	0.10098	0.104786	0.0225221	0.344245
HC34	HC	0.134143	0.0162682	1.51082	0.171	0.361929	0.0701323	0.017683	0.00504224	0.0153006	0.00629484	0.00536452	0.142845	0.0434705	0.102833	0.00505469	0.0782606	0.0192274	0.011245	0.0429719	0.0247077	0.0400874	0.0635445	0.139706	0.0086258	0.0200939	0.0324558	1.80202	0.477739	0.0437677	0.202057	0.0197832	0.114448	0.150574	0.0939408	0.105572	0.0224925	0.406778
HC35	HC	0.132658	0.0149803	1.51318	0.172459	0.360667	0.0591922	0.0183533	0.00510988	0.0145636	0.0049213	0.00350875	0.1389	0.0445385	0.105442	0.00635598	0.0767504	0.017134	0.0111227	0.0305523	0.0246131	0.0397108	0.0416626	0.138863	0.00760993	0.018818	0.0310724	1.77105	0.471743	0.0460173	0.20695	0.0211286	0.116692	0.15084	0.0952879	0.111101	0.0230333	0.407069
HC36	HC	0.105019	0.0145046	1.39745	0.126866	0.243218	0.10416	0.0262893	0.00358366	0.0273365	0.00575687	0.0071256	0.122572	0.0334243	0.0736664	0.00602354	0.0537694	0.0358459	0.0120672	0.0414797	0.0305302	0.0390809	0.0614139	0.151962	0.00621271	0.0211446	0.0494632	2.22697	0.64612	0.0458941	0.309178	0.0284056	0.135588	0.213902	0.219366	0.144039	0.0336902	0.407225
HC37	HC	0.101315	0.0135474	1.40994	0.129428	0.251675	0.0941635	0.0269572	0.00473578	0.0269564	0.00591473	0.00712397	0.129529	0.0324924	0.0740572	0.00953274	0.0574561	0.033812	0.0100974	0.0332595	0.0305974	0.0373348	0.0466213	0.155751	0.00541407	0.0175756	0.0464986	2.19921	0.647477	0.046268	0.323783	0.0316116	0.136175	0.217146	0.220302	0.152328	0.0320765	0.420571
HC38	HC	0.0707241	0.000227767	1.84753	0.0881074	0.312037	0.0010346	0.0132929	0.00497348	0.0410786	0.00503285	0.00701877	0.0505138	0.018413	0.0139002	0.00359916	0.0299173	0.0144592	0.0200622	0.0035901	0.0137082	0.0198357	0.00315973	0.132608	0.00503419	0.00986578	0.0263653	1.20265	0.278481	0.0213629	0.273253	0.017768	0.0355794	0.171865	0.21101	0.104697	0.0306689	0.355766
HC39	HC	0.0944817	0.0224355	1.4852	0.0981471	0.250527	0.0617749	0.0256164	0.00867148	0.0450515	0.00738591	0.00470047	0.104922	0.0323446	0.0444723	0.00527346	0.0520295	0.0286997	0.0117797	0.0181698	0.019001	0.0301611	0.0263106	0.0611053	0.00817105	0.0178952	0.0407329	1.99473	0.536164	0.0251579	0.233854	0.0181885	0.0400133	0.174406	0.171627	0.110135	0.022562	0.357968
HC40	HC	0.105331	0.0307295	1.82723	0.179809	0.306372	0.077497	0.0274793	0.00552652	0.0180811	0.00796087	0.00502838	0.122716	0.0349933	0.141378	0.0124537	0.0625093	0.0293022	0.00799556	0.0490972	0.0199549	0.0423832	0.0722755	0.117038	0.00986375	0.026445	0.0429805	2.20785	0.00093043	0.0421968	0.265884	0.0272356	0.15644	0.20424	0.110122	0.116014	0.0218353	0.297875
HC41	HC	0.0870234	0.011583	1.39809	0.0849549	0.318394	0.0515065	0.0242366	0.00453556	0.0422819	0.00549754	0.00717424	0.108612	0.0273451	0.0658853	0.0034055	0.0565247	0.0320974	0.00733672	0.0324865	0.0221779	0.0343054	0.0396812	0.038597	0.00469071	0.0154305	0.0315062	1.59477	0.398955	0.0345961	0.241362	0.0346256	0.112187	0.164777	0.154857	0.1023	0.0202863	0.379169
HC42	HC	0.128242	0.01476	1.67968	0.186489	0.317863	0.107002	0.0179796	0.0044329	0.0097296	0.010461	0.00677319	0.136449	0.0364841	0.0844431	0.003521	0.0694919	0.0239972	0.0100516	0.0565998	0.0189828	0.0434542	0.0748464	0.23338	0.00757534	0.0212831	0.0288823	1.6402	0.43047	0.0475041	0.246692	0.0133217	0.106397	0.13332	0.116911	0.107445	0.0242431	0.296511
HC43	HC	0.107633	0.0195197	2.08315	0.144981	0.313248	0.0851675	0.0313092	0.00597303	0.0286617	0.00710389	0.0109829	0.146592	0.044909	0.0920801	0.0143438	0.0851821	0.0275655	0.00726353	0.0546478	0.0232828	0.0404458	0.0686185	0.0943307	0.00856695	0.0244874	0.0420069	1.70272	0.447133	0.0343533	0.267976	0.0210896	0.0948947	0.207655	0.133898	0.125228	0.0230146	0.24555
HC44	HC	0.109659	0.0204744	1.65195	0.100519	0.207337	0.0664994	0.0314105	0.00617015	0.0176568	0.00536569	0.0074277	0.137117	0.0414918	0.0652439	0.00651575	0.06428	0.0227713	0.0107096	0.0373061	0.0326054	0.0340086	0.0575741	0.124374	0.0071079	0.0172565	0.0362779	1.73133	0.447017	0.0341246	0.214635	0.0171402	0.0776072	0.159732	0.0967212	0.115861	0.0235626	0.452676
HC45	HC	0.0939588	0.0173269	1.6571	0.156999	0.230865	0.076496	0.0295447	0.00559473	0.0382367	0.00512596	0.00652764	0.137561	0.042984	0.0976874	0.0119341	0.0614893	0.0304341	0.00733581	0.0517265	0.017158	0.0428107	0.0632336	0.0358282	0.0113902	0.0426066	0.0738197	2.78956	0.871165	0.0330377	0.324346	0.0289098	0.0953335	0.228243	0.165442	0.148436	0.0458885	0.273979
HC46	HC	0.101752	0.0155995	2.07039	0.111555	0.225616	0.0735057	0.0265451	0.0068635	0.0353293		0.00449054	0.123655	0.0357757	0.0874439	0.00445146	0.0759566	0.00140809	0.0336924	0.0322026	0.0411366	0.0381048	0.0458088	0.0597095	0.0158281	0.0176624	0.0244445	1.25515	0.285192	0.0319312	0.308812	0.0303449	0.0622168	0.18896	0.196785	0.140078	0.0446415	0.414264
HC47	HC	0.092632	0.0206053	2.02533	0.162941	0.31506	0.0661385	0.0290424	0.00507251	0.0163996	0.00904071	0.00735507	0.169372	0.0470884	0.0886039	0.0118734	0.0534924	0.0310245	0.00866465	0.0444007	0.0352916	0.0421952	0.0788996	0.252458	0.00776225	0.0183797	0.0300941	1.71345	0.432139	0.0479403	0.273925	0.0197057	0.194409	0.156362	0.124221	0.130172	0.0291885	0.409528
HC48	HC	0.101617	0.0341882	2.04322	0.202163	0.374269	0.112006	0.0292864	0.0051564	0.0216097	0.00926007	0.00555983	0.151397	0.0427862	0.0960669	0.00756957	0.0742434	0.0325432	0.00880201	0.0581341	0.0307371	0.0416967	0.0788367	0.196848	0.00901673	0.0191458	0.0267674	1.70933	0.448128	0.0406755	0.235078	0.0182573	0.116118	0.175204	0.13854	0.107372	0.0158629	0.282198
HC49	HC	0.106073	0.0166126	1.72183	0.128709	0.239456	0.0618132	0.0572487	0.00651794	0.0703806	0.0132138	0.00484012	0.170818	0.0485538	0.0854707	0.0123954	0.0663286	0.0378337	0.00685652	0.0438609	0.0300064	0.0365576	0.0673754	0.0879111	0.00799889	0.0257667	0.0462101	2.13316	0.615979	0.0368294	0.332248	0.0276641	0.113216	0.21291	0.171022	0.163487	0.0367226	0.406271
HC50	HC	0.10618	0.0196293	2.13276	0.15185	0.298353	0.082745	0.0324845	0.00492125	0.0286609	0.00514479	0.00578671	0.149338	0.0470326	0.0959368	0.0102065	0.0872825	0.0280336	0.00751662	0.0429123	0.0247825	0.045692	0.0563797	0.0990553	0.00882853	0.0213655	0.042105	1.70852	0.448536	0.0378914	0.287554	0.0248839	0.127498	0.206337	0.139246	0.169824	0.0261005	0.307838
HC51	HC	0.0924006	0.02175	1.78778	0.11057	0.000657553	0.0744616	0.0287118	0.00580654	0.0183008	0.00413001	0.00658914	0.119488	0.0400254	0.0590673	0.00688579	0.070092	0.0254503	0.0148478	0.0392381	0.0358122	0.0388464	0.0593691	0.132063	0.00918214	0.0138835	0.036431	1.76365	0.466929	0.0377179	0.2169	0.0188471	0.0822986	0.161352	0.100597	0.132887	0.0242551	0.315689
HC52	HC	0.0953289	0.0203137	1.75148	0.108424	0.285264	0.0633748	0.0264799	0.00516493	0.0176743	0.00490376	0.00643944	0.0960165	0.0390616	0.0556443	0.00800008	0.0703319	0.0269098	0.01406	0.0262475	0.0359901	0.0369352	0.0361769	0.129547	0.00936862	0.0150016	0.0373085	1.76119	0.474761	0.0364487	0.223395	0.0206695	0.0670647	0.165644	0.105649	0.145664	0.0271191	0.311471
HC53	HC	0.0923508	0.016937	1.68491	0.165545	0.293375	0.0842947	0.0269131	0.00604491	0.0405173	0.00697694	0.00721835	0.137173	0.0436989	0.0972859	0.00736407	0.0703041	0.0308955	0.0103134	0.0438312	0.0179849	0.0415818	0.051067	0.0379453	0.0101437	0.0210269	0.0711467	2.74444	0.88212	0.031931	0.327813	0.0283807	0.0317788	0.215736	0.160437	0.151654	0.0364944	0.355326
HC54	HC	0.093648	0.0177684	1.6927	0.170329	0.302296	0.0741212	0.0274576	0.00667065	0.0417745	0.00619843	0.00707491	0.134504	0.0450664	0.0980905	0.0103199	0.0697653	0.0271437	0.00846734	0.0388375	0.0195257	0.0504154	0.0444651	0.041839	0.00836207	0.0237683	0.0741821	2.71746	0.868825	0.0349618	0.353947	0.0298173	0.0903511	0.233902	0.169417	0.182039	0.0586415	0.354629
HC55	HC	0.0856578	0.0165955	2.11126	0.107017	0.357009	0.0678131	0.0238319	0.00481647	0.0392032	0.00389933	0.00532464	0.086003	0.0357689	0.0707085	0.0060747	0.0778236	0.0373229	0.00941866	0.0257482	0.039681	0.0328091	0.0390823	0.0627159	0.0168083	0.015816	0.0228217	1.2724	0.287981	0.032285	0.322346	0.0307652	0.0426981	0.184384	0.200716	0.143232	0.0420412	0.497592
KYDS1	KYDS	0.0812936	0.0357686	1.57949	0.215228	0.198528	0.0759885	0.0245052	0.00404419	0.0141935	0.0135702	0.00428156	0.151306	0.0423158	0.0936259	0.00113474	0.0686372	0.0234594	0.0141019	0.0472687	0.0259865	0.0429176	0.04829	0.258736	0.0100037	0.0236956	0.0489758	2.28683	0.754891	0.0399795	0.295805	0.0347509	0.234458	0.179394	0.125152	0.120753	0.0382907	0.544746
KYDS2	KYDS	0.0458051	0.00906955	1.97833	0.057579	0.452384	0.00940738	0.0107842	0.00736305	0.00987501	0.00546392	0.0125427	0.0371566	0.033409	0.00600511	0.0039376	0.00867472	0.00886644	0.0189317	0.0040576	0.0151113	0.0194575	0.00670412	0.0887266	0.00762298	0.0117211	0.0203976	1.60681	0.434745	0.0308419	0.285681	0.0234109	0.14052	0.18667	0.148076	0.132088	0.0417207	0.411653
KYDS3	KYDS	0.110082	0.00285587	1.32756	0.143316	0.266882	0.067964	0.0251325	0.00479691	0.00988902	0.00997964	0.00727155	0.121038	0.0285856	0.124195	0.00238481	0.0426902	0.0315093	0.00880131	0.0328026	0.0138263	0.0369897	0.0362689	0.324032	0.0106569	0.0553138	0.0413322	2.73683	0.904174	0.0308617	0.223381	0.0248975	0.129777	0.146478	0.0988822	0.114282	0.0343114	0.349756
KYDS4	KYDS	0.10155	0.00333383	1.97044	0.233154	0.342868	0.0737559	0.0227328	0.00474934	0.0159945	0.0115489	0.00501894	0.151166	0.0463339	0.120906	0.00139959	0.0621181	0.0198999	0.0118288	0.0390768	0.0218664	0.042235	0.0495825	0.240806	0.0987648	0.0772393	0.0247622	2.24121	0.680622	0.0555658	0.217566	0.0269447	0.148525	0.163847	0.0811951	0.10619	0.0235569	0.326556
KYDS5	KYDS	0.0958282	0.00302872	1.92859	0.180679	0.228192	0.0903353	0.0247561	0.00300978	0.017479	0.0109401	0.00684932	0.145582	0.0453461	0.0684594	0.00304568	0.0929246	0.0255889	0.00971166	0.055568	0.0182526	0.0531259	0.0505755	0.205536	0.0690885	0.0706263	0.0343523	2.75677	0.889182	0.0551784	0.242115	0.024416	0.139907	0.179805	0.0914039	0.10565	0.0294357	0.270741
KYDS6	KYDS	0.11585	0.00250023	1.21238	0.253877	0.162951	0.0939486	0.0285821	0.00423228	0.0141749	0.0160435	0.00465341	0.134453	0.0400896	0.11013	0.00251919	0.0550455	0.027772	0.00369743	0.0482516	0.0140468	0.0341591	0.054538	0.20355	0.00698262	0.0319796	0.0316581	2.2031	0.687192	0.0300835	0.188847	0.0185963	0.0990752	0.111799	0.116518	0.11181	0.0192676	0.293641
KYDS7	KYDS	0.0984787	0.00317196	1.51081	0.196666	0.30298	0.0735004	0.0177752	0.00485234	0.0126418	0.00538413	0.00641056	0.108303	0.0307445	0.0861575	0.00420809	0.0604392	0.0218842	0.00413467	0.0396944	0.0178428	0.0347495	0.035107	0.212211	0.0171953	0.0246029	0.0246453	2.08495	0.615543	0.0322329	0.21231	0.0261531	0.1463	0.165365	0.0965611	0.110105	0.0195794	0.317309
KYDS8	KYDS	0.121398	0.00298394	1.10093	0.1626	0.308494	0.0642258	0.0177067	0.00512902	0.0199019	0.00826508	0.00562213	0.0952592	0.0253638	0.0950676	0.00122966	0.0549501	0.0201142	0.00162932	0.0279827	0.013205	0.0279361	0.0327186	0.186457	0.00388648	0.0168502	0.0328111	2.23461	0.655867	0.0244565	0.323341	0.0259159	0.0710642	0.211428	0.192921	0.154366	0.0151802	0.325733
KYDS9	KYDS	0.108415	0.00276815	2.08532	0.182605	0.358945	0.0511031	0.0409858	0.00356064	0.0251793	0.0110872	0.00666178	0.163467	0.0423564	0.0959417	0.0063339	0.0587596	0.0267278	0.0127594	0.0316844	0.0320324	0.0454016	0.037942	0.214834	0.00841564	0.0147008	0.0438582	1.7846	0.471005	0.045669	0.337015	0.023501	0.171285	0.192064	0.191792	0.155118	0.0399868	0.331958
KYDS10	KYDS	0.0989192	0.00377764	1.54608	0.186336	0.296573	0.0735796	0.0231582	0.00551217	0.0137279	0.0100224	0.00474817	0.146381	0.0425184	0.138666	0.00584003	0.0579129	0.0255464	0.00948152	0.0396072	0.015627	0.0382415	0.0516156	0.174218	0.00624337	0.0172432	0.0277508	1.7259	0.452789	0.0358942	0.214465	0.0232308	0.079739	0.158972	0.0936095	0.128713	0.0238595	0.346078
KYDS11	KYDS	0.0971259	0.00349308	1.54574	0.17219	0.250271	0.0697677	0.0268407	0.00503536	0.0191512	0.00619906	0.00431655	0.159207	0.0439021	0.0653668	0.00971787	0.0573904	0.0232491	0.00819254	0.0286762	0.0254521	0.04261	0.0432416	0.155615	0.0109768	0.0179264	0.030106	1.70832	0.473497	0.0436108	0.252267	0.0200678	0.113913	0.178824	0.143858	0.12425	0.0243034	0.354154
KYDS12	KYDS	0.0886948	0.00243439	1.53417	0.187118	0.390713	0.0959683	0.0199248	0.00550418	0.0207041	0.0121037	0.00596216	0.14741	0.0471297	0.0805727	0.0041695	0.0588654	0.0213501	0.00623828	0.0264272	0.0256483	0.0451465	0.0309186	0.141152	0.00820534	0.0132037	0.0253783	1.64402	0.435992	0.0408078	0.304696	0.0192289	0.173431	0.205816	0.185444	0.139002	0.027646	0.465277
KYDS13	KYDS	0.024171	0.0173468	1.46447	0.0409039	0.193521	0.0174924	0.0247781	0.0157945	0.0542129	0.0076253	0.00743029	0.0320819	0.0400046	0.0755795			0.0077538	0.00604574	0.00481327	0.0138528	0.0238018	0.0047231	0.181634	0.00739879	0.0100099	0.0376779	2.20013	0.648615	0.0292645	0.29433	0.0302468	0.134558	0.226121	0.18633	0.118375	0.0313711	0.25521
KYDS14	KYDS	0.0223205	0.0168386	1.46892	0.0362609	0.192927	0.0152886	0.0225778	0.0156346	0.0448783	0.00343324	0.00598702	0.0278951	0.040542	0.0728021	0.00251093	0.00277392	0.0104021	0.00770537		0.0108163	0.0173398	0.0027728	0.170932	0.00543395	0.00794513	0.0369432	2.12871	0.645594	0.0280061	0.298544	0.0291703	0.126965	0.221636	0.184523	0.129926	0.031949	0.257124
KYDS15	KYDS	0.0934841	0.0215914	1.64117	0.189234	0.411286	0.101629	0.0248321	0.00567771	0.0220042	0.0127086	0.00820279	0.163413	0.0441745	0.132349	0.00593141	0.0759437	0.0185721	0.00796384	0.00047115	0.0202315	0.0390092	0.0503837	0.235465	0.00867914	0.028868	0.0355416	2.30085	0.671936	0.0404184	0.247006	0.0277448	0.153888	0.188326	0.142745	0.121022	0.0342745	0.328692
KYDS16	KYDS	0.0913725	0.0227127	1.60554	0.195552	0.420454	0.088826	0.0258617	0.00712803	0.0216845	0.0122436	0.00847853	0.159609	0.0449203	0.133931	0.00914475	0.0736919	0.0190547	0.00770721	0.033561	0.0196517	0.0372774	0.0330783	0.229561	0.00836405	0.0269192	0.0346747	2.21792	0.658862	0.0414687	0.238189	0.0272843	0.155012	0.182936	0.137783	0.123695	0.033439	0.297717
KYDS17	KYDS	0.0955296	0.0183329	1.92147	0.183476	0.281431	0.10679	0.0217076	0.00663468	0.0415035	0.0155001	0.00912711	0.153438	0.044577	0.110658	0.0091378	0.0921339	0.0322457	0.01017	0.0518036	0.0320094	0.0473685	0.0701061	0.181001	0.00813975	0.0246934	0.0403396	1.89605	0.528352	0.0447184	0.312542	0.0199531	0.0616255	0.222605	0.21666	0.116441	0.0224229	0.291325
KYDS18	KYDS	0.0905819	0.0186404	1.90691	0.181087	0.284178	0.0943211	0.0213458	0.00624582	0.0397455	0.0157049	0.0073182	0.153143	0.0414247	0.105128	0.00872179	0.0926304	0.0321273	0.010329	0.0392778	0.0316784	0.0456633	0.0447003	0.18061	0.00811154	0.0236872	0.0391581	1.88512	0.519389	0.0415422	0.30908	0.0209873	0.0602304	0.216476	0.212162	0.115772	0.0223338	0.282899
KYDS19	KYDS	0.0501421	0.0251483	1.62138	0.0791296	0.407355	0.0170211	0.0258715	0.00851954	0.0233877	0.00687499	0.0241707	0.0613805	0.0295867	0.0177104	0.00298316	0.0254881	0.0126611	0.00914454	0.00303359	0.0196689	0.0280003	0.00394942	0.215399	0.00661542	0.0147544	0.0375445	2.40736	0.722226	0.0404853	0.296272	0.0248101	0.108641	0.224152	0.152563	0.162317	0.0304974	0.477538
KYDS20	KYDS	0.0482405	0.0253202	1.64548	0.0853041	0.410292	0.0116478	0.0274544	0.00957361	0.0228089	0.0065731	0.024703	0.0585685	0.0354804	0.0149184	0.00742637	0.0239944	0.0130853	0.0107112	0.00659172	0.0165617	0.0305406	0.00679483	0.216961	0.00611649	0.0138855	0.0365718	2.38035	0.710258	0.0390969	0.308834	0.0237585	0.107537	0.21965	0.15076	0.174485	0.0249852	0.457011
KYDS21	KYDS	0.113037	0.0299699	1.67972	0.128126	0.372703	0.0517678	0.046453	0.00842929	0.0384046	0.0125464	0.00718296	0.14589	0.042018	0.0566938	0.00869005	0.0545902	0.0197017	0.00947202	0.0258076	0.0227585	0.0315298	0.0295122	0.184641	0.00699551	0.0150907	0.0321241	2.32225	0.552327	0.0336228	0.357865	0.025712	0.136438	0.249111	0.21224	0.203507	0.0319892	0.416377
KYDS22	KYDS	0.109003	0.0299903	1.62376	0.125389	0.357987	0.0454631	0.0432623	0.00931651	0.0379617	0.0105371	0.00801682	0.136713	0.0406177	0.0560122	0.00936646	0.055514	0.0262279	0.0111546	0.021776	0.021829	0.0320712	0.0286888	0.190205	0.00795032	0.0130684	0.0309866	2.28365	0.549991	0.0343709	0.342573	0.0287164	0.135898	0.249224	0.209796	0.19123	0.0308755	0.438491
KYDS23	KYDS	0.0964927	0.0239535	1.44713	0.144353	0.252066	0.0594009	0.0191158	0.0045341	0.0352091	0.0130663	0.00478467	0.111762	0.0339292	0.0757448	0.00851303	0.0631728	0.0243163	0.00711	0.0285185	0.0219078	0.0285917	0.0310883	0.201698	0.00749442	0.0155914	0.0319278	2.05577	0.590021	0.0287416	0.308571	0.0284291	0.0701975	0.203217	0.199877	0.175145	0.0308334	0.288841
KYDS24	KYDS	0.113279	0.0221035	1.36303	0.0941357	0.559942	0.0101688	0.0225786	0.0139623	0.0268161	0.00775899	0.0129261	0.0723205	0.022131	0.0220941	0.00483381	0.0111821	0.0468861	0.0139182	0.0217059	0.000977628	0.025543	0.00558964	0.173435	0.00629987	0.0109223	0.0400592	2.19694	0.531323	0.0303223	0.263204	0.0300987	0.229762	0.145633	0.154662	0.129343	0.0265268	0.320969
KYDS25	KYDS	0.105583	0.0250272	1.38174	0.0807895	0.561046	0.0113354	0.02263	0.0173218	0.0255091	0.00724274	0.0124197	0.0479167	0.0265204	0.011377	0.00183374	0.000300972	0.0504323	0.0132412		0.0176426	0.0174031	0.0010898	0.164902	0.00636992	0.00809755	0.0370007	2.17616	0.523997	0.0275538	0.269732	0.0325915	0.211081	0.146244	0.156425	0.147021	0.0260737	0.318045
KYDS26	KYDS	0.105494	0.00366296	1.57916	0.142674	0.244789	0.08699	0.028126	0.00569033	0.0450935	0.00580363	0.00778147	0.132842	0.0419937	0.0692523	0.010776	0.0597345	0.0294913	0.0104065	0.0555666	0.0296685	0.0344377	0.0623451	0.176771	0.00428278	0.0127383	0.0348405	1.95554	0.529352	0.0318164	0.398501	0.0231202	0.195425	0.346979	0.288984	0.155785	0.0237277	0.290774
KYDS27	KYDS	0.107028	0.003609	1.60038	0.156839	0.261537	0.0947298	0.0304719	0.00860248	0.0442372	0.00485332	0.00585929	0.137388	0.0420235	0.0703696	0.0127608	0.0626456	0.0289412	0.0103975	0.0551279	0.0316103	0.0367851	0.0607046	0.178596	0.00644916	0.0146024	0.035015	1.94741	0.530522	0.0314774	0.397134	0.0250875	0.191549	0.337436	0.285474	0.171806	0.0206563	0.269298
KYDS28	KYDS	0.102656	0.0290649	1.60696	0.207495	0.340491	0.0934717	0.0236465	0.00547547	0.0178355	0.00990196	0.00575395	0.156622	0.0426143	0.0911487	0.00605789	0.0645075	0.0297571	0.00453751	0.0457712	0.03179	0.0353066	0.0699486	0.233438	0.00422238	0.0186989	0.0324083	2.50676	0.744812	0.0303652	0.269856	0.01701	0.136467	0.151873	0.13032	0.126115	0.031688	0.227833
KYDS29	KYDS	0.0889704	0.0195121	1.91732	0.0912854	0.296568	0.0460934	0.0251335	0.00515316	0.0181019	0.0100544	0.0020783	0.0832675	0.0307132	0.0343939	0.0090131	0.0652027	0.0335491	0.0103039	0.0242912	0.0270825	0.037604	0.0354926	0.183681	0.006536	0.0146827	0.024019	1.60153	0.366382	0.0382891	0.390042	0.0219574	0.144596	0.28747	0.161634	0.190027	0.0772054	0.320373
KYDS30	KYDS	0.0917519	0.0177311	1.93849	0.153379	0.30479	0.0600909	0.0260868	0.00586612	0.0164122	0.0100026	0.00233703	0.122798	0.0409854	0.0534118	0.00648082	0.0689731	0.0203781	0.00637085	0.0192603	0.0279664	0.0374356	0.0293613	0.183536	0.00597246	0.0133622	0.0239591	1.62826	0.373497	0.0366275	0.337542	0.0242305	0.11903	0.23193	0.146806	0.152351	0.0520091	0.304478
KYDS31	KYDS	0.117703	0.010626	1.80287	0.21385	0.230963	0.0744472	0.0307673	0.00616918	0.0197435	0.0116848	0.0068864	0.175382	0.0468317	0.124726	0.00821552	0.0649979	0.0394049	0.0100124	0.0357485	0.0216808	0.049701	0.0542184	0.152094	0.00714396	0.0221046	0.0430911	2.08911	0.574967	0.0427992	0.352295	0.0265367	0.106185	0.212723	0.173264	0.188429	0.0510452	0.394721
KYDS32	KYDS	0.080817	0.0182423	2.05041	0.108632	0.209015	0.040497	0.0134281	0.00604628	0.019656	0.00612185	0.00538487	0.0566678	0.0255446	0.0418269	0.00663165	0.0840261	0.019166	0.0142411	0.00660326	0.0219001	0.027547	0.00598436	0.171383	0.0108846	0.0143171	0.0163165	1.92712	0.522737	0.0332553	0.21647	0.0320783	0.0548654	0.166621	0.0861816	0.0917734	0.0209065	0.380787
KYDS33	KYDS	0.079811	0.0191625	2.07569	0.0942388	0.217308	0.0299559	0.014149	0.00772107	0.0202879	0.00641866	0.00433129	0.0510817	0.025313	0.0262781	0.00659956	0.0586066	0.0197743	0.0159517	0.00578906	0.0226888	0.0241012	0.00415818	0.157216	0.0105279	0.0143652	0.0173027	1.91499	0.530688	0.0335111	0.217607	0.0325188	0.0526584	0.17083	0.0889453	0.0938878	0.0231479	0.380022
KYDS34	KYDS	0.085707	0.0239345	1.76916	0.194923	0.373731	0.000463367	0.0221922	0.00490638	0.0146941	0.0112108	0.00547981	0.116596	0.0354256	0.0706076	0.0096147	0.0481382	0.0139988	0.0138619	0.0221725	0.0199169	0.0313645	0.0292568	0.201975	0.00691327	0.0162519	0.0351218	1.86	0.508189	0.032419	0.2844	0.0214218	0.172226	0.177449	0.145139	0.126961	0.0295311	0.327595
KYDS35	KYDS	0.0622656	0.0288356	2.00638	0.0554688	0.269576	0.0172692	0.0348668	0.00646236	0.0246089	0.0162844	0.0067094	0.0569529	0.0310074	0.0208801	0.00663925	0.0284258	0.0256386	0.00965654	0.0122004	0.0306747	0.0298757	0.0259876	0.12562	0.00920224	0.0218857	0.0351965	2.49901	0.644527	0.0395276	0.336771	0.0188374	0.0535683	0.173105	0.155746	0.118839	0.0250474	0.27578
KYDS36	KYDS	0.0899853	0.0175917	1.87568	0.221764	0.253967	0.0672961	0.0283634	0.00500185	0.0169744	0.00794236	0.00760893	0.133756	0.0396043	0.11321	0.0131007	0.059313	0.0178092	0.00634214	0.0416218	0.0239062	0.0318977	0.0432777	0.0974714	0.0082355	0.017879	0.0292797	1.99827	0.56048	0.0328729	0.28915	0.021595	0.0617038	0.160939	0.148133	0.120929	0.0306804	0.348257
KYDS37	KYDS	0.107238	0.018652	1.6692	0.193281	0.300033	0.0724228	0.0355579	0.0056404	0.0238176	0.0111187	0.00737005	0.147706	0.0409469	0.10505	0.0095158	0.0664485	0.0212535	0.00667003	0.0396822	0.023131	0.0428928	0.0564747	0.182403	0.00596965	0.0240769	0.0367658	2.07406	0.59221	0.0426602	0.271799	0.0240057	0.17327	0.164699	0.133436	0.116582	0.0312823	0.302707
KYDS38	KYDS	0.0724924	0.0209255	2.22792	0.000906887	0.34198	0.0672806	0.0176346	0.00453631	0.0184961	0.00645702	0.00663039	0.0506617	0.0189541	0.032012	0.00340876	0.0566213	0.0332857	0.0111109	0.0139588	0.0243134	0.0219294	0.0277775	0.169334	0.00464906	0.0231587	0.0186593	1.44198	0.357372	0.0231833	0.231608	0.0252286	0.051087	0.159594	0.100103	0.120263	0.0406635	0.342538
KYDS39	KYDS	0.0705694	0.0183617	2.22571	0.107761	0.318915	0.058339	0.0181753	0.00637285	0.0171891	0.00627078	0.00463801	0.0654198	0.020738	0.0344076	0.00417818	0.0549349	0.0254237	0.0102469	0.0111111	0.0237951	0.0210858	0.0167055	0.149347	0.0247819	0.0246217	0.020108	1.51483	0.344552	0.0212982	0.253954	0.0268882	0.0507381	0.171144	0.10313	0.139282	0.0489542	0.338369
KYDS40	KYDS	0.0755447	0.0162315	0.00811746	0.1596	0.236429	0.0708233	0.013476	0.00680619	0.0139493	0.00804778	0.00376272	0.109093	0.0367152	0.117396	0.00577054	0.0626334	0.0270593	0.00864805	0.0333875	0.0289062	0.0250396	0.0335027	0.161394	0.00728992	0.012058	0.0258569	1.74333	0.398381	0.0346951	0.210723	0.0198252	0.0976704	0.142896	0.0963959	0.116015	0.0203257	0.388194
KYDS41	KYDS	0.0705083	0.0193735	0.0085746	0.0754981	0.253326	0.035469	0.0123593	0.00543582	0.0140085	0.00708631	0.00596491	0.0616285	0.0281078	0.0472494	0.00566758	0.0420247	0.0245017	0.0107554	0.0159564	0.0284777	0.0211546	0.0146641	0.180901	0.00536043	0.00823768	0.027928	1.66889	0.398384	0.0308967	0.218904	0.0239906	0.102576	0.155931	0.103175	0.120384	0.0226883	0.401632
KYDS42	KYDS	0.0863882	0.00990063	1.12044	0.117854	0.27605	0.000434786	0.0351647	0.00597911	0.0845285	0.00714002	0.00455764	0.12015	0.0306787	0.0526311	0.00556966	0.0667806	0.0314006	0.0110768	0.0330672	0.0146116	0.0338343	0.0399671	0.145498	0.00539476	0.0204067	0.0421887	2.07258	0.599158	0.0250102	0.295021	0.0291522	0.138203	0.21716	0.178897	0.131189	0.0297083	0.322792
KYDS43	KYDS	0.0466318	0.0120598	2.2595	0.0281006	0.258843	0.0280531	0.0139406	0.00972663	0.0310742	0.0117511	0.00680148	0.0114089		0.00252823	0.00582582		0.0197684	0.0132778	0.00299219	0.00830313	0.00293458	0.000481444	0.195028	0.0135288	0.0223959	0.0161557	1.65969	0.35438	0.0217086	0.268886	0.0220943	0.0461578	0.168862	0.0948964	0.145894	0.0296686	0.324437
KYDS44	KYDS	0.104094	0.0223328	2.2833	0.177901	0.305615	0.0901349	0.0256545	0.00371088	0.0194423	0.00884414	0.00766866	0.119812	0.0319546	0.0689239	0.010249	0.0800895	0.0124141	0.0124946	0.0346694	0.0379318	0.032894	0.0378807	0.212183	0.00908747	0.0188941	0.0233311	1.63892	0.458465	0.033169	0.258024	0.0256019	0.105505	0.164933	0.160344	0.131355	0.0266259	0.398665
KYDS45	KYDS	0.0756981	0.0212495	2.31828	0.116085	0.275959	0.0354648	0.0312016	0.00668962	0.0227406	0.0119975	0.00352491	0.0684703	0.0215864	0.0308411	0.00503099	0.0639821	0.00990727	0.00864187	0.00868352	0.0305786	0.0227306	0.0113914	0.192031	0.00849562	0.0169937	0.0244757	1.7778	0.479294	0.0326889	0.316398	0.0218736	0.0622345	0.213622	0.244583	0.136303	0.0305718	0.442482
KYDS46	KYDS	0.109337	0.0133418	1.3194	0.101172	0.313446	0.0461657	0.0326386	0.00731063	0.114016	0.0121815	0.00608134	0.0610474	0.0208354	0.0284077	0.00549257	0.0519681	0.0163809	0.00318686	0.0130203	0.0199492	0.0159414	0.0205907	0.174748	0.00693753	0.0210228	0.0355693	2.27111	0.698233	0.0246469	0.383374	0.0191541	0.0984323	0.245657	0.301205	0.157506	0.0477495	0.465029
KYDS47	KYDS	0.112198	0.0111016	1.31935	0.0943859	0.317051	0.0394905	0.0340791	0.00898403	0.114963	0.0145635	0.00807328	0.0590719	0.0225538	0.030707	0.00851351	0.0545321	0.0149566	0.0032754	0.0141207	0.0228118	0.0191351	0.0184349	0.175513	0.00660272	0.0206791	0.036996	2.27165	0.696445	0.0268308	0.393473	0.0194967	0.106119	0.242237	0.299269	0.151613	0.044393	0.465088
KYDS48	KYDS	0.102583	0.0112696	1.2251	0.134651	0.347909	0.0853442	0.0214498	0.00469923	0.0256346	0.00808221	0.00689165	0.13019	0.031553	0.084425	0.00847352	0.0742961	0.0147876	0.0100416	0.048504	0.0142522	0.0367592	0.0716995	0.121772	0.00672399	0.0220214	0.0410922	2.20058	0.635952	0.0405836	0.2633	0.0225459	0.0342052	0.153173	0.123901	0.13438	0.0207773	0.38886
KYDS49	KYDS	0.110527	0.0112807	1.31582	0.120218	0.235651	0.0843448	0.0372755	0.00621317	0.107288	0.0118565	0.0077831	0.138257	0.0342165	0.0722751	0.00789627	0.0707903	0.0261227	0.00733808	0.0371728	0.0175219	0.0350988	0.0598517	0.203821	0.00576914	0.0232697	0.042877	2.29261	0.710948	0.0272529	0.369482	0.0245824	0.0944575	0.220904	0.30425	0.155529	0.0313257	0.416602
KYDS50	KYDS	0.129299	0.0173394	2.50967	0.00163643	0.499252	0.0273538	0.0295432	0.00652822	0.0285403	0.0147172	0.00742736	0.0576457	0.0276423	0.0216216	0.00874637	0.0617288	0.027628	0.014916	0.0080106	0.0265391	0.0235814	0.00748792	0.0845319	0.0123733	0.0168523	0.020744	1.53203	0.368329	0.039594	0.287481	0.0262504	0.0853259	0.234653	0.190142	0.159861	0.0219138	0.486685
KYDS51	KYDS	0.110602	0.0225923	2.21785	0.144479	0.254983	0.0619644	0.0269806	0.00532799	0.0467699	0.00655017	0.00650614	0.0879375	0.0268987	0.0636381	0.00457904	0.0664787	0.0217468	0.0124121	0.03433	0.0247701	0.0321859	0.0419388	0.238281	0.0061247	0.0081707	0.0155636	1.19583	0.0027783	0.0342271	0.347183	0.0206859	0.117762	0.210804	0.244435	0.146481	0.0245667	0.532953
KYDS52	KYDS	0.111546	0.0232277	2.20341	0.140897	0.260348	0.0512382	0.0240184	0.00498657	0.0463571	0.00627392	0.00289747	0.0712097	0.0232329	0.0499962	0.0066091	0.0642751	0.0246705	0.0140846	0.0263711	0.0269195	0.0351065	0.0317672	0.232089	0.00726075	0.0124288	0.0176121	1.17988	0.0047951	0.0336833	0.337894	0.0221328	0.119975	0.203026	0.234421	0.104441	0.0256066	0.526675
KYDS53	KYDS	0.12873	0.0132603	1.54183	0.192328	0.351229	0.0886631	0.0184611	0.00457886	0.0151054	0.00806963	0.00573705	0.12611	0.0443115	0.0917554	0.00370843	0.0721492	0.0239152	0.0104789	0.0483655	0.0217649	0.0350664	0.0635024	0.199213	0.00435988	0.0134536	0.0236678	1.84195	0.00438806	0.0345428	0.254336	0.016826	0.0889379	0.16518	0.132904	0.112506	0.0179253	0.37717
KYDS54	KYDS	0.121072	0.0118678	1.53928	0.195626	0.364072	0.0858545	0.0183628	0.0053592	0.0163659	0.00832303	0.00781656	0.0985561	0.0384222	0.0700236	0.00216987	0.0738669	0.0213706	0.0100242	0.0352874	0.0209822	0.0309913	0.0484889	0.20206	0.00362079	0.0132936	0.0216278	1.816	0.491789	0.0354721	0.252397	0.01953	0.0944277	0.166663	0.134953	0.108065	0.0202019	0.365812
KYDS55	KYDS	0.0929629	0.0256354	2.52438	0.231626	0.265059	0.0998067	0.0296112	0.00599849	0.0198774	0.0106668	0.00403411	0.132519	0.0307634	0.0997628	0.00710097	0.0707208	0.0313471	0.0170509	0.0480299	0.0375401	0.0335485	0.0561199	0.183849	0.0111422	0.0190174	0.0204671	1.45537	0.35498	0.0342589	0.333178	0.0239112	0.0927289	0.213903	0.225128	0.149923	0.0345974	0.369198
KYDS56	KYDS	0.0943347	0.0149427	2.62291	0.172366	0.186171	0.0860739	0.022769	0.00533121	0.0164723	0.00740946	0.00503134	0.0934894	0.035055	0.0756252	0.013547	0.0788795	0.0308555	0.0143939	0.0338726	0.0334162	0.0325409	0.0410086	0.182486	0.0126516	0.0120479	0.0225233	1.5164	0.362248	0.0340469	0.290801	0.0336344	0.0311023	0.160616	0.162144	0.142743	0.0420741	0.509119
KYDS57	KYDS	0.0940493	0.0154813	2.60851	0.169018	0.190521	0.0710258	0.0229395	0.00680161	0.0165043	0.0070479	0.00471963	0.0744416	0.0272232	0.0494442	0.00980032	0.0757875	0.0267995	0.0185811	0.022922	0.0314478	0.0314527	0.0238773	0.181633	0.0133811	0.0144071	0.0240212	1.52485	0.366611	0.0358633	0.293106	0.0345634	0.050894	0.171321	0.168429	0.154953	0.0555438	0.511754
KYDS58	KYDS	0.118436	0.0158543	3.13109	0.22492	0.270095	0.0734014	0.0299802	0.00447568	0.0193736	0.0115663	0.00586668	0.136827	0.0487052	0.151376	0.0105568	0.0757914	0.0194651	0.0155939	0.0373337	0.0681185	0.0402477	0.0503284	0.177118	0.00890964	0.0127472	0.016061	1.14307	0.247578	0.0450089	0.393133	0.0295816	0.155101	0.282248	0.22406	0.192944	0.0499208	0.399401
KYDS59	KYDS	0.100101	0.00833304	1.76622	0.182392	0.217891	0.0836627	0.024728	0.0037459	0.0197914	0.0116396	0.00516035	0.13768	0.0394839	0.115237	0.00608137	0.0753446	0.0341106	0.00605091	0.0506884	0.0187511	0.0337141	0.0717542	0.264654	0.00684478	0.0212323	0.0291615	2.06894	0.588913	0.0357951	0.301614	0.0181927	0.116332	0.183008	0.139602	0.140856	0.0324443	0.351779
KYDS60	KYDS	0.105234	0.01415	2.5427	0.204364	0.243636	0.07133	0.0280591	0.00517983	0.0250557	0.0120918	0.00685804	0.164425	0.0518616	0.0653955	0.00813143	0.0646621	0.030487	0.0112488	0.0505546	0.0360341	0.0474135	0.0621059	0.205211	0.00951338	0.0131701	0.0158508	1.41142	0.333712	0.0424654	0.328937	0.0229937	0.0880929	0.216277	0.1852	0.138714	0.0257069	0.333626
KYDS61	KYDS	0.09854	0.0160329	2.42971	0.199999	0.284405	0.0984852	0.0256688	0.00498362	0.019963	0.016104	0.00500038	0.156494	0.0440698	0.0902965	0.00841811	0.0786659	0.030915	0.0126957	0.0616133	0.0340647	0.044869	0.0806355	0.210567	0.0113412	0.016537	0.0253444	1.52895	0.380759	0.0429732	0.320487	0.0228189	0.0973886	0.186534	0.19026	0.129406	0.026723	0.335412
KYDS62	KYDS	0.10673	0.0254382	2.36052	0.231054	0.260032	0.0778124	0.0381051	0.00603002	0.0252533	0.0159178	0.00681848	0.182697	0.0495828	0.0897925	0.011121	0.0805913	0.0163894	0.0134237	0.0429103	0.0410491	0.0412582	0.0588686	0.237664	0.0120424	0.0267001	0.0290702	2.4322	0.740595	0.032478	0.3363	0.0228818	0.0847114	0.175075	0.205467	0.14962	0.0347945	0.412601
KYDS63	KYDS	0.116435	0.0149779	1.82406	0.188899	0.196451	0.0605066	0.0451492	0.00544705	0.0310412	0.0101261	0.00626795	0.158259	0.0421521	0.0754092	0.00608119	0.0573519	0.0371162	0.00961748	0.0436155	0.0302179	0.0388598	0.0764417	0.224396	0.023898	0.0331951	0.0425513	2.24627	0.640092	0.042865	0.323557	0.0258055	0.129422	0.179478	0.22872	0.128721	0.0355934	0.307562
KYDS64	KYDS	0.110781	0.0131342	1.81448	0.180964	0.195735	0.0461589	0.0413197	0.00391703	0.0310002	0.0109732	0.00581429	0.152542	0.041512	0.0730947	0.00941906	0.0594011	0.0375559	0.00961895	0.0313658	0.0304313	0.0435472	0.052124	0.233503	0.0279205	0.0347276	0.0471283	2.22766	0.652005	0.043866	0.329595	0.0279129	0.140074	0.184605	0.233941	0.134452	0.0363077	0.31146
KYDS65	KYDS	0.0843668	0.014197	1.73553	0.124463	0.238324	0.0859735	0.0298042	0.00545042	0.0646271	0.0173524	0.00787956	0.0915063	0.0442238	0.0630177	0.00929585	0.0682782	0.0267336	0.00750113	0.0440099	0.02044	0.0339731	0.055762	0.235016	0.00831167	0.0171044	0.0381149	1.96255	0.552283	0.0426595	0.300997	0.0218467	0.107517	0.236179	0.219235	0.117149	0.0269769	0.345164
KYDS66	KYDS	0.0751775	0.0108892	1.73567	0.110532	0.236586	0.0662608	0.0291667	0.0057344	0.0613973	0.0162383	0.00709644	0.0840899	0.0374052	0.0534148	0.00847734	0.0637904	0.0273414	0.0076523	0.0294136	0.0196459	0.0335429	0.0348406	0.235902	0.00630566	0.0131495	0.0370292	2.01677	0.539641	0.0422478	0.298768	0.0209859	0.104768	0.225602	0.207408	0.11165	0.0240929	0.335611
KYDS67	KYDS	0.0802909	0.00894448	1.93545	0.116327	0.327457	0.082699	0.018994	0.00714892	0.034419	0.00716793	0.00750944	0.0681899	0.0325266	0.0550208	0.00577425	0.0840075	0.0261587	0.0151473	0.0253212	0.0195437	0.029539	0.0308711	0.232548	0.00677978	0.0123933	0.0230687	1.73303	0.452304	0.034938	0.419527	0.0293923	0.109374	0.253834	0.238684	0.147528	0.0340845	0.359647
